# Supplementary material for: The Role of Serotype Interactions and Seasonality in Dengue Model Selection and Control: Insights from a Pattern Matching Approach
Source: PLoS Negl Trop Dis. 2016 May 9;10(5):e0004680. doi: 10.1371/journal.pntd.0004680 (PMC4861330; doi:10.1371/journal.pntd.0004680)
Supplement: S1 Table — Logistic regression model coefficients with pattern match as binary response variables and the parameters (scaled 0–1) as independent variables. Red are high coefficient values (>|3|). (XLSX) [file pntd.0004680.s009.xlsx]

## Sheet: Table S1 LogReg w Interactions
		R2	int	β0	β1	αSUS	αTRANS	ρ	β0: β1	β0: αSUS	β0: αTRANS	β0: ρ	β1:αSUS	β1: αTRANS	β1: ρ	αSUS: αTRANS	αSUS: ρ	αTRANS: ρ
Base	Inter-Peak Period	0.182986	-0.569935	2.51335	6.46847	0	0	0	-10.2216	0	0	0	0	0	0	0	0	0
Base	Multi-annual cycle	0.507268	-2.92311	3.44855	-6.46855	0	0	0	11.961	0	0	0	0	0	0	0	0	0
Base	Duration of serotype replacement	0.122958	0.998398	-0.974573	-4.32133	0	0	0	6.24648	0	0	0	0	0	0	0	0	0
Base	Intensity single serotype emergence	0.524715	-3.11877	4.01799	-6.88412	0	0	0	12.0219	0	0	0	0	0	0	0	0	0
Base	Phase-locking	0.177271	-4.56123	6.31499	-0.844483	0	0	0	-4.49925	0	0	0	0	0	0	0	0	0
Base	Simultaneous fit	0.0334815	-3.90414	3.82936	-1.935	0	0	0	-1.97399	0	0	0	0	0	0	0	0	0
CI	Inter-Peak Period	0.621971	-12.8496	-7.12615	19.9055	0	0	12.5208	-1.99961	0	0	4.72423	0	0	-14.6275	0	0	0
CI	Multi-annual cycle	0.472198	4.12044	21.9731	-7.46788	0	0	-2.368	-3.36239	0	0	-15.1568	0	0	3.97171	0	0	0
CI	Duration of serotype replacement	0.384756	-0.0946694	19.121	-0.685219	0	0	0.488771	-10.5854	0	0	-9.25101	0	0	-0.2409	0	0	0
CI	Intensity single serotype emergence	0.215612	3.31789	-3.94142	-2.4794	0	0	1.19606	6.81173	0	0	4.80377	0	0	-5.1831	0	0	0
CI	Phase-locking	0.599816	1.52238	0.774541	-7.31184	0	0	1.25629	5.65227	0	0	5.02563	0	0	-16.0427	0	0	0
CI	Simultaneous fit	0.103788	-22.4457	15.526	0.884283	0	0	21.6547	-3.33613	0	0	-13.7876	0	0	-6.09806	0	0	0
ADE	Inter-Peak Period	0.313845	2.03886	-0.690032	1.09651	-7.7591	0	0	-2.13416	11.7302	0	0	10.282	0	0	0	0	0
ADE	Multi-annual cycle	0.483704	-3.2492	3.41615	-2.72829	9.06892	0	0	5.92308	-2.54146	0	0	-6.00234	0	0	0	0	0
ADE	Duration of serotype replacement	0.197086	-0.577057	1.12364	-1.07957	3.75783	0	0	1.63745	-8.81738	0	0	-5.22577	0	0	0	0	0
ADE	Intensity single serotype emergence	0.47398	-4.71544	5.46171	-5.59101	10.8697	0	0	11.7491	-10.9242	0	0	-3.24673	0	0	0	0	0
ADE	Phase-locking	0.319556	-4.41688	5.44872	-4.11531	5.68356	0	0	0.231766	-3.62364	0	0	-2.98019	0	0	0	0	0
ADE	Simultaneous fit	0.0215985	-4.41878	4.26065	-2.52628	2.5439	0	0	-0.121528	-8.80814	0	0	-0.503897	0	0	0	0	0
ADE+CI	Inter-Peak Period	0.487648	-13.4231	6.24292	18.2005	1.49561	0	9.82345	-14.3686	5.0324	0	-2.49991	-4.69963	0	-5.832	0	1.13428	0
ADE+CI	Multi-annual cycle	0.187202	5.15538	4.6649	-5.71289	-0.356869	0	-1.78122	3.59085	-4.82512	0	-2.25116	2.85469	0	0.210294	0	-0.696355	0
ADE+CI	Duration of serotype replacement	0.341077	6.30511	-1.54902	-8.13466	0.97919	0	-0.682517	12.2048	-5.55581	0	-3.8532	2.01472	0	-0.882945	0	-1.57866	0
ADE+CI	Intensity single serotype emergence	0.0844379	3.05647	-3.46611	-0.907213	-1.59454	0	-1.50751	2.83627	-0.0330616	0	6.04423	2.39877	0	-2.40024	0	2.29399	0
ADE+CI	Phase-locking	0.562204	2.91545	-0.670068	-11.672	-0.481962	0	1.27295	11.8656	-2.40139	0	2.39903	5.92014	0	-15.0285	0	2.48501	0
ADE+CI	Simultaneous fit	0.078865	-11.1421	8.14629	-6.75575	6.09418	0	10.919	6.29219	-4.83172	0	-7.07813	5.00445	0	-3.70778	0	-5.0265	0
ADEx2	Inter-Peak Period	0.641367	-1.37462	7.34166	8.85284	-0.726295	-0.807491	0	-3.98075	-0.564271	-4.45899	0	-2.53567	-4.23012	0	-10.2394	0	0
ADEx2	Multi-annual cycle	0.395684	-0.476862	3.40023	-1.10117	1.08675	0.303321	0	-2.11683	4.76919	4.71398	0	-0.641876	0.452194	0	-5.22508	0	0
ADEx2	Duration of serotype replacement	0.272376	2.59286	-7.81024	-3.36367	-1.90896	-1.68505	0	2.152	5.54089	8.11814	0	0.606745	0.850959	0	0.809342	0	0
ADEx2	Intensity single serotype emergence	0.366232	-2.57829	2.14362	-1.42656	6.06101	6.82324	0	3.06119	-0.928482	3.66909	0	-2.01942	-2.85615	0	-9.29386	0	0
ADEx2	Phase-locking	0.458086	-4.80107	5.10995	-0.957443	6.64904	8.05655	0	-0.151208	-2.66717	4.87015	0	-1.49672	-3.15399	0	-8.22805	0	0
ADEx2	Simultaneous fit	0.0342094	-2.06776	2.31207	-4.08095	-0.375976	0.312658	0	3.08738	-4.79156	-5.07767	0	3.51555	3.92797	0	-5.13234	0	0
ADEx2+CI	Inter-Peak Period	0.493572	-9.83866	0.573579	15.3061	1.37124	1.00446	5.99073	-12.6599	7.01774	7.81992	3.65124	-5.47247	-6.22736	-2.82586	0.921235	-0.182643	-0.778983
ADEx2+CI	Multi-annual cycle	0.210424	4.43408	3.07845	-2.48879	-2.33479	-3.25096	-2.3531	-1.36794	3.27857	2.32942	-2.04355	0.536243	0.894724	1.65843	1.10472	-0.425736	0.518889
ADEx2+CI	Duration of serotype replacement	0.466246	4.43175	2.0936	-4.95984	0.914581	-0.265151	0.0565773	9.07789	-6.9559	-6.14334	-6.03886	1.13614	3.73106	-1.49601	-1.70033	-1.07323	-1.31051
ADEx2+CI	Intensity single serotype emergence	0.0828489	0.756384	0.391906	1.09561	0.643994	1.32771	0.510419	-2.03928	-1.6213	-3.44298	3.54532	2.01614	2.64573	-1.31134	-0.617521	-0.229157	0.259583
ADEx2+CI	Phase-locking	0.520229	-0.348849	6.27239	-3.28737	2.09751	4.61335	2.83866	11.1058	-9.09135	-6.48645	-1.5752	2.37427	2.54832	-12.9967	1.06966	2.28313	4.54525
ADEx2+CI	Simultaneous fit	0.0663531	-7.88323	2.93289	4.23441	4.05732	2.68538	5.94094	0.51247	-2.43527	-2.57302	-1.72569	-0.806628	0.826277	-3.66008	-3.44176	-2.66813	-2.10671
